# Supplementary material
Source: publisher figshare collection journal article supplement (https://asha.figshare.com/articles/dataset/_/24415735)
Supplement: Supplementary file 1 [file 1]

**Supplemental Material S2.** Predictive validity by automated index and sibling group, covarying maternal education.

| Variable                    | Overall  |          | Sibs-autism |          | Sibs-NA  |          |
|-----------------------------|----------|----------|-------------|----------|----------|----------|
|                             | Exp Lang | Rec Lang | Exp Lang    | Rec Lang | Exp Lang | Rec Lang |
| AVA raw score               | .05      | .10      | -.18        | .15      | .10      | -.01     |
| RVC                         | .11      | .08      | .07         | .26      | .02      | -.23     |
| Child Vocalization Count    | .34*     | .29      | .25         | .31      | .49**    | .31      |
| Child Vocalization Duration | .34*     | .26      | .29         | .27      | .51***   | .32*     |
| IVD                         | -.13     | -.26     | .05         | -.35*    | -.10     | -.12     |
| ACPU-C+V                    | .12      | .08      | .07         | .08      | .35*     | .20      |

*Note.* Sibs-NA = infants with typically developing older siblings; Sibs-autism = infants with at least one older sibling diagnosed with autism; AVA = Automated Vocalization Analysis raw score (Richards et al., 2017); RVC = Reciprocal Vocal Contingency score (Harbison et al., 2018); IVD = Infraphonological Vocal Development score (Woynaroski et al., 2017; Yoder et al., 2013); ACPU-C+V = Average Count Per Utterance-Consonant+Vowel score (Woynaroski et al., 2017; Xu et al., 2014); Exp Lang = expressive language aggregate; Rec Lang = receptive language aggregate.

\* $p < .05$ . \*\* $p < .01$ . \*\*\* $p < .001$ .
