# Supplementary material
Source: publisher figshare collection journal article supplement (https://asha.figshare.com/articles/dataset/_/24415735)
Supplement: Supplementary file 2 [file 1]

**Supplemental Material S1.** Concurrent validity by automated index and sibling group, covarying maternal education.

| Variable                    | Overall           |          | Sibs-autism       |          | Sibs-NA           |                  |
|-----------------------------|-------------------|----------|-------------------|----------|-------------------|------------------|
|                             | Exp Lang          | Rec Lang | Exp Lang          | Rec Lang | Exp Lang          | Rec Lang         |
| AVA raw score               | .19               | .03      | -.05              | -.01     | .16               | -.06             |
| RVC                         | .14               | .06      | .19               | .18      | -.13              | -.19             |
| Child Vocalization Count    | .19 <sup>†</sup>  | .29      | -.13              | .24      | .40 <sup>*</sup>  | .33 <sup>*</sup> |
| Child Vocalization Duration | .15 <sup>†</sup>  | .26      | -.23              | .20      | .44 <sup>**</sup> | .34 <sup>*</sup> |
| IVD                         | -.35 <sup>*</sup> | -.22     | -.47 <sup>*</sup> | -.32     | -.15              | -.06             |
| ACPU-C+V                    | .03 <sup>†</sup>  | .04      | -.16              | .02      | .28               | .18              |

*Note.* Sibs-NA = infants with typically developing older siblings; Sibs-autism = infants with at least one older sibling diagnosed with autism; AVA = Automated Vocalization Analysis raw score (Richards et al., 2017); RVC = Reciprocal Vocal Contingency score (Harbison et al., 2018); IVD = Infraphonological Vocal Development score (Woynaroski et al., 2017; Yoder et al., 2013); ACPU-C+V = Average Count Per Utterance-Consonant+Vowel score (Woynaroski et al., 2017; Xu et al., 2014); Exp Lang = expressive language aggregate; Rec Lang = receptive language aggregate.

<sup>†</sup>Association was moderated by Sibling group ( $p$  for interaction term in multiple regression analyses  $< .1$ ).

<sup>\*</sup> $p < .05$ . <sup>\*\*</sup> $p < .01$ .
